# Supplementary material for: 1D, 2D and 3D luminescent zinc(ii) coordination polymers assembled from varying flexible thioether ligands
Source: Royal Society of Chemistry journal article supplement (doi:10.1039/b806964f), 2008-01-01
Supplement: b806964f.pdf [file b806964f.pdf]

# Supporting information for

## **1D, 2D and 3D Luminescent Zinc(II) Coordination Polymers Assembled by Varying Flexible Sulfur-ether Ligands**

*Peng Ren, Ming-Li Liu, Jun Zhang, Wei Shi, Peng Cheng,\**

*Dai-Zheng Liao, Shi-Ping Yan*

Department of Chemistry, Nankai University, Tianjin 300071, P. R. China

---

\* To whom correspondence should be addressed.  
E-mail: pcheng@nankai.edu.cn

ORTEP view of the three complexes

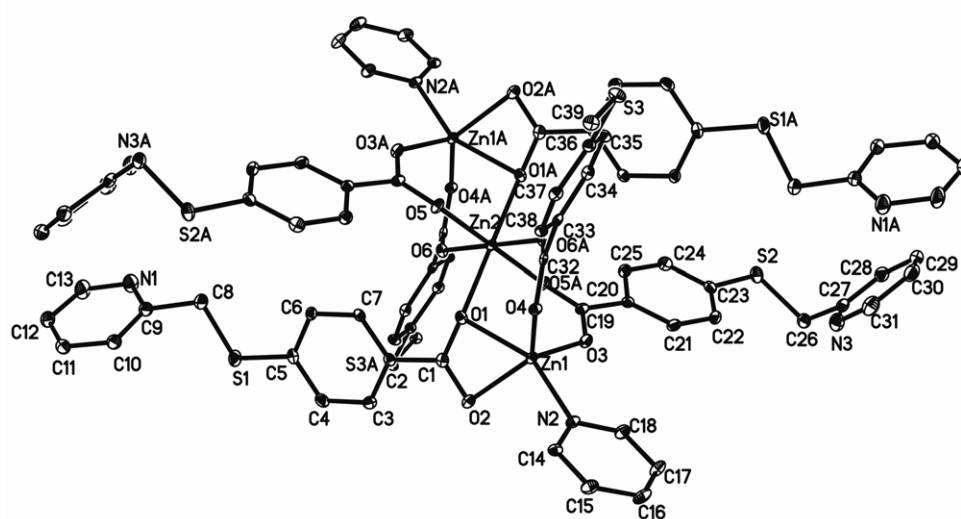

Figure S1 ORTEP plot with numbering scheme for 1

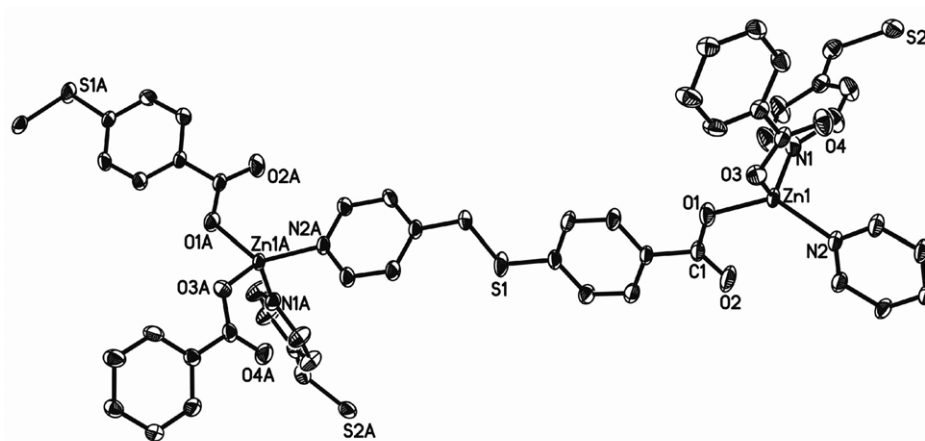

Figure S2 ORTEP plot with numbering scheme for 2

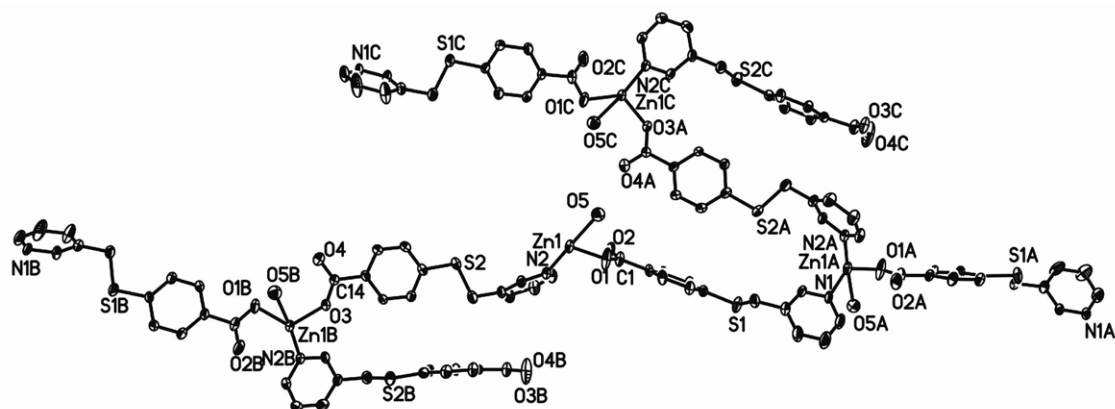

Figure S3 ORTEP plot with numbering scheme for 3
